# Supplementary material
Source: Springer Nature journal article supplement (https://www.springermedizin.de/resource/supplementary/13012_2006_73_MOESM1_ESM.pdf/9629188)
Supplement: MOESM1 [file 9629188]

Formation of the  
transfer seed

Decision to  
transfer

First day of  
use

Achievement of  
satisfactory  
performance

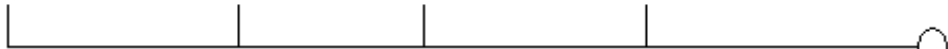

Initiation

Implementation

Ramp up

Integration
